# Supplementary material for: Ethnic inequalities in COVID-19 vaccine uptake and comparison to seasonal influenza vaccine uptake in Greater Manchester, UK: A cohort study
Source: PubMed Central journal article supplement (PMC8893324; doi:10.1371/journal.pmed.1003932), 2022-03-03
Supplement: pmed.1003932.s001.pdf [file pmed.1003932.s001.pdf]

## S1 – Appendix

**Figure A** - Flow chart showing inclusion criteria and missing data. Abbreviations: Greater Manchester (GM), General Practice (GP), Lower-layer Super Output Area (LSOA) (LSOAs are neighbourhood-level administrative boundaries containing approx. 1000 residents).

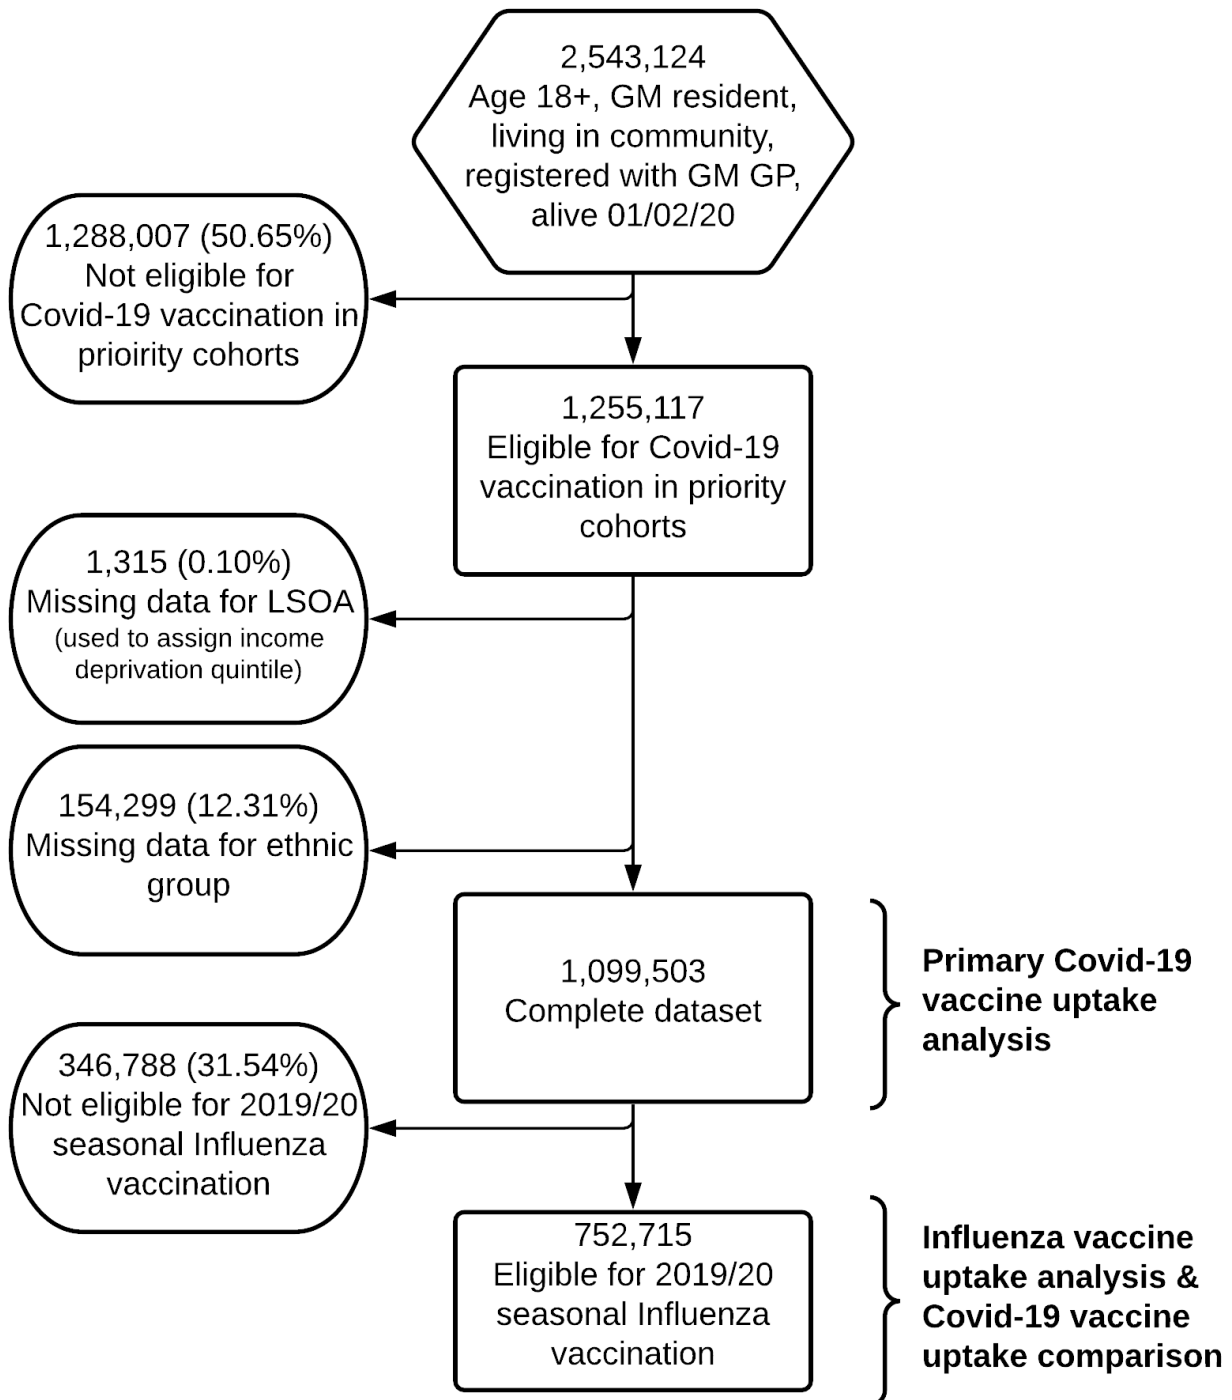

**Figure B** –  $\log(-\log(\text{survival}))$  versus  $\log(\text{time})$  plots stratified by ethnic group for Covid-19 and Influenza vaccine uptake

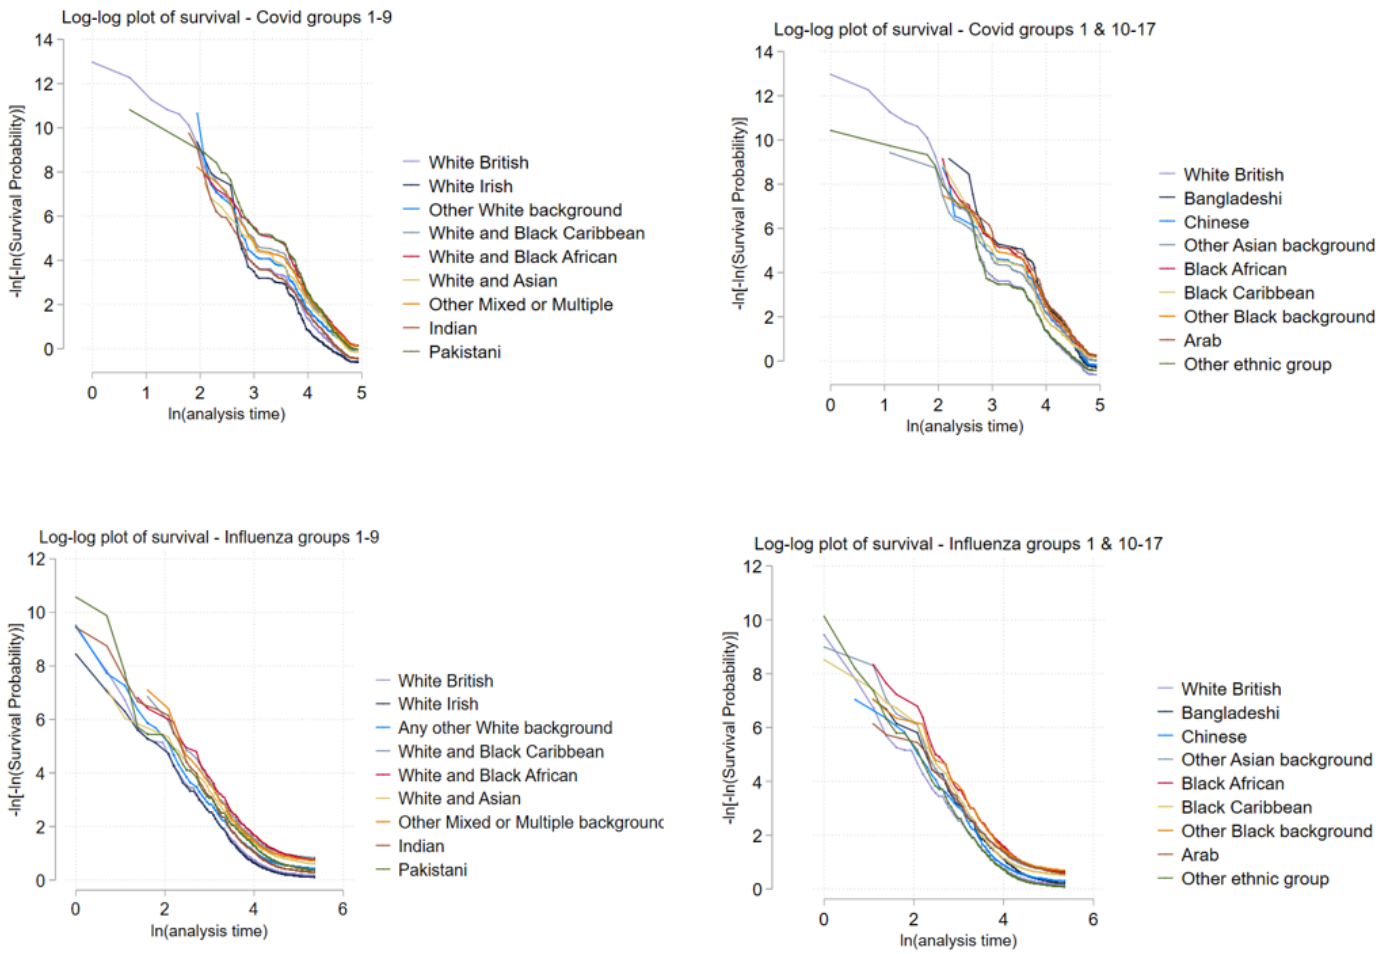

**Figure C** – Kaplan-Meier failure curves indicating the cumulative probability of vaccination over time for (A) Covid-19 and (B) Influenza vaccines, stratified by Covid-19 vaccination eligibility group. Individuals were assigned to the highest priority vaccine eligibility group for which they were eligible. Priority proceeded from those aged 80+ down the age brackets, with the high clinical risk group eligible at the same time as the 70-74 age group, and the moderate clinical risk group eligible between the 65-69 and 60-64 age groups, as indicated in the legend group order. Vaccine eligibility groups are mutually exclusive, such that (for example) an individual aged 80 with high clinical vulnerability would be in the 80+ age group, whereas an individual aged 65 with high clinical vulnerability would be in the high clinical vulnerability group.

**A**

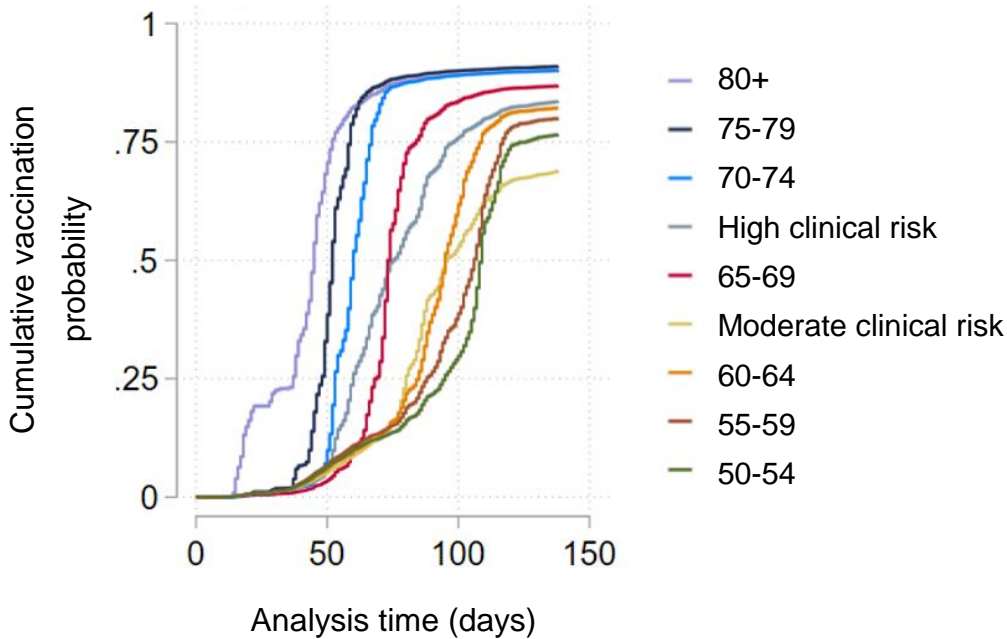

**B**

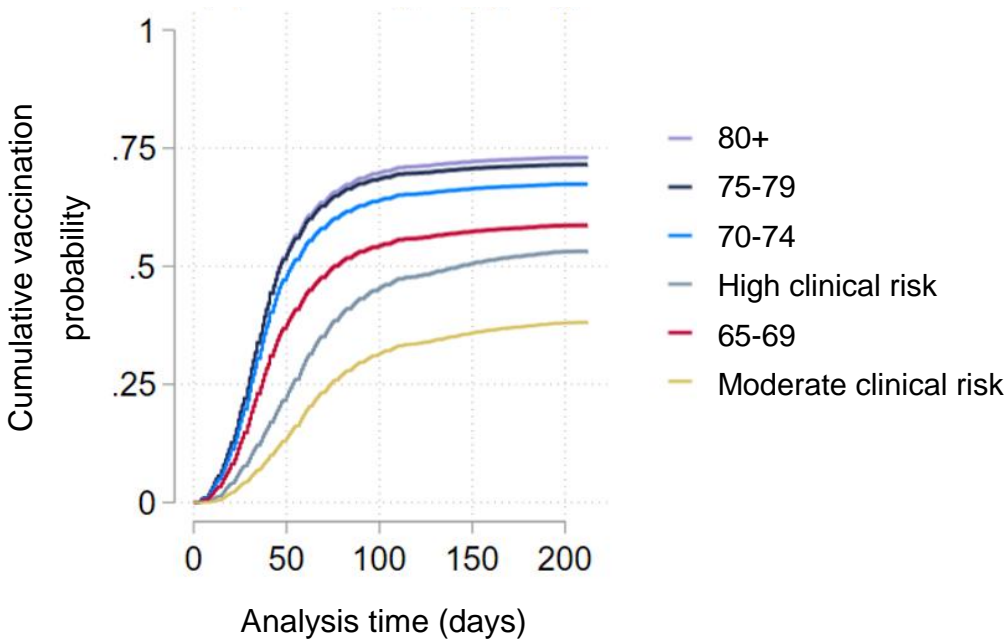

**Table A** – Vaccine uptake by population subgroup and vaccine type (percentage uptake and 95% ci)

|                                               | Covid-19 vaccine uptake<br>2020/2021 |               | Influenza vaccine uptake<br>2019/20 <sup>1</sup> |               |
|-----------------------------------------------|--------------------------------------|---------------|--------------------------------------------------|---------------|
|                                               | Percentage                           | 95% ci        | Percentage                                       | 95% ci        |
| <b>Ethnic group<sup>2</sup></b>               |                                      |               |                                                  |               |
| White British                                 | 87.93                                | [87.86,88.00] | 57.03                                            | [56.90,57.16] |
| White Irish                                   | 86.40                                | [85.76,87.02] | 59.07                                            | [58.04,60.09] |
| Any other White background                    | 69.97                                | [69.53,70.40] | 47.32                                            | [46.71,47.92] |
| White and Black Caribbean                     | 64.31                                | [62.49,66.09] | 35.13                                            | [32.99,37.34] |
| White and Black African                       | 67.05                                | [65.26,68.79] | 37.10                                            | [34.90,39.35] |
| White and Asian                               | 77.35                                | [75.38,79.21] | 41.70                                            | [38.99,44.46] |
| Other Mixed or Multiple background            | 66.87                                | [65.34,68.37] | 38.25                                            | [36.32,40.22] |
| Indian                                        | 84.76                                | [84.22,85.29] | 52.33                                            | [51.45,53.22] |
| Pakistani                                     | 75.28                                | [74.90,75.66] | 49.49                                            | [48.99,49.99] |
| Bangladeshi                                   | 81.87                                | [81.08,82.64] | 54.86                                            | [53.75,55.96] |
| Chinese                                       | 75.47                                | [74.40,76.52] | 52.12                                            | [50.42,53.80] |
| Other Asian background                        | 70.85                                | [70.04,71.64] | 41.15                                            | [40.07,42.23] |
| Black African                                 | 65.83                                | [65.15,66.51] | 40.86                                            | [40.00,41.73] |
| Black Caribbean                               | 62.17                                | [61.04,63.28] | 44.24                                            | [42.84,45.64] |
| Other Black background                        | 60.39                                | [58.78,61.99] | 38.83                                            | [36.83,40.86] |
| Arab                                          | 64.22                                | [61.67,66.69] | 42.79                                            | [39.63,46.02] |
| Any other ethnic group                        | 82.84                                | [82.43,83.23] | 59.54                                            | [58.92,60.15] |
| <b>Income deprivation<sup>2</sup></b>         |                                      |               |                                                  |               |
| Least deprived                                | 86.63                                | [86.47,86.78] | 58.70                                            | [58.41,58.98] |
| Q2                                            | 87.02                                | [86.86,87.17] | 57.75                                            | [57.47,58.03] |
| Q3                                            | 83.99                                | [83.83,84.15] | 54.08                                            | [53.80,54.35] |
| Q4                                            | 83.07                                | [82.91,83.22] | 53.31                                            | [53.06,53.56] |
| Most deprived                                 | 77.95                                | [77.83,78.07] | 49.22                                            | [49.04,49.40] |
| <b>Gender</b>                                 |                                      |               |                                                  |               |
| Male                                          | 81.70                                | [81.60,81.80] | 53.78                                            | [53.62,53.94] |
| Female                                        | 83.24                                | [83.15,83.33] | 52.93                                            | [52.78,53.08] |
| <b>Vaccine eligibility group</b>              |                                      |               |                                                  |               |
| High clinical risk                            | 87.21                                | [87.02,87.40] | 51.91                                            | [51.63,52.20] |
| Moderate clinical risk                        | 80.02                                | [79.87,80.17] | 36.82                                            | [36.64,37.00] |
| 80+                                           | 87.47                                | [87.26,87.67] | 70.18                                            | [69.90,70.46] |
| 75-79                                         | 89.34                                | [89.14,89.55] | 69.00                                            | [68.69,69.30] |
| 70-74                                         | 88.23                                | [88.05,88.41] | 64.47                                            | [64.21,64.73] |
| 65-69                                         | 84.64                                | [84.43,84.85] | 55.39                                            | [55.08,55.70] |
| 60-64                                         | 78.87                                | [78.62,79.12] | N/A                                              | -             |
| 55-59                                         | 78.34                                | [78.12,78.56] | N/A                                              | -             |
| 50-54                                         | 76.20                                | [75.99,76.41] | N/A                                              | -             |
| <b>Prior Influenza vaccination (2019/20)*</b> |                                      |               |                                                  |               |
| Not vaccinated                                | 74.64                                | [74.55,74.74] | N/A                                              | -             |
| Vaccinated                                    | 95.46                                | [95.40,95.52] | N/A                                              | -             |

<sup>1</sup> Sample restricted to those eligible for Influenza vaccination<sup>2</sup> More income-deprived quintiles and most minority ethnic groups have younger population age structures relative to less income-deprived groups and the White British group respectively, so % uptake figures presented in this table should be interpreted with caution as trends are substantially confounded by age

**Table B – Associations between ethnic group and Covid-19 vaccine uptake** (results also in Figure 1A) Hazard ratios with 95% confidence intervals from Cox proportional hazards models estimating time-to-Covid-19 vaccination across ethnic groups, stratified by vaccine eligibility group

|                           | High clinical | Moderate clinical | 80+           | 75-79         | 70-74         | 65-69         | 60-64         | 55-59         | 50-54         |
|---------------------------|---------------|-------------------|---------------|---------------|---------------|---------------|---------------|---------------|---------------|
| White British             | Ref           | Ref               | Ref           | Ref           | Ref           | Ref           | Ref           | Ref           | Ref           |
|                           | -             | -                 | -             | -             | -             | -             | -             | -             | -             |
| White Irish               | 0.908         | 0.975             | 0.940         | 1.096         | 1.062         | 0.923         | 0.876         | 0.872         | 0.817         |
|                           | [0.829,0.995] | [0.920,1.033]     | [0.900,0.982] | [1.041,1.155] | [1.006,1.120] | [0.870,0.980] | [0.806,0.952] | [0.804,0.946] | [0.756,0.882] |
| Other White background    | 0.578         | 0.581             | 0.844         | 0.796         | 0.749         | 0.621         | 0.542         | 0.553         | 0.522         |
|                           | [0.554,0.602] | [0.565,0.596]     | [0.810,0.879] | [0.758,0.834] | [0.720,0.779] | [0.596,0.647] | [0.520,0.566] | [0.533,0.573] | [0.505,0.539] |
| White and Black Caribbean | 0.437         | 0.489             | 0.536         | 0.622         | 0.631         | 0.640         | 0.488         | 0.462         | 0.505         |
|                           | [0.394,0.485] | [0.445,0.536]     | [0.450,0.637] | [0.499,0.775] | [0.490,0.814] | [0.524,0.783] | [0.403,0.592] | [0.397,0.539] | [0.442,0.577] |
| White and Black African   | 0.468         | 0.525             | 0.387         | 0.471         | 0.513         | 0.455         | 0.481         | 0.428         | 0.504         |
|                           | [0.430,0.510] | [0.477,0.577]     | [0.269,0.557] | [0.302,0.732] | [0.399,0.659] | [0.358,0.578] | [0.393,0.589] | [0.364,0.504] | [0.448,0.566] |
| White and Asian           | 0.561         | 0.640             | 0.678         | 0.758         | 0.585         | 0.820         | 0.773         | 0.711         | 0.857         |
|                           | [0.497,0.634] | [0.578,0.709]     | [0.468,0.981] | [0.567,1.013] | [0.437,0.781] | [0.668,1.006] | [0.624,0.958] | [0.602,0.841] | [0.752,0.976] |
| Other Mixed or Multiple   | 0.454         | 0.518             | 0.511         | 0.562         | 0.505         | 0.690         | 0.477         | 0.526         | 0.528         |
|                           | [0.415,0.498] | [0.479,0.561]     | [0.411,0.635] | [0.442,0.716] | [0.417,0.612] | [0.585,0.813] | [0.403,0.565] | [0.467,0.593] | [0.476,0.586] |
| Indian                    | 0.768         | 0.988             | 0.602         | 0.738         | 0.875         | 0.922         | 0.862         | 0.949         | 0.932         |
|                           | [0.742,0.796] | [0.952,1.026]     | [0.564,0.642] | [0.688,0.791] | [0.825,0.928] | [0.874,0.974] | [0.805,0.924] | [0.892,1.010] | [0.883,0.984] |
| Pakistani                 | 0.485         | 0.626             | 0.461         | 0.484         | 0.564         | 0.608         | 0.512         | 0.522         | 0.557         |
|                           | [0.475,0.495] | [0.614,0.638]     | [0.440,0.482] | [0.457,0.513] | [0.538,0.591] | [0.586,0.632] | [0.484,0.541] | [0.499,0.547] | [0.539,0.576] |
| Bangladeshi               | 0.547         | 0.638             | 0.464         | 0.588         | 0.612         | 0.684         | 0.730         | 0.733         | 0.768         |
|                           | [0.532,0.562] | [0.613,0.665]     | [0.425,0.507] | [0.520,0.666] | [0.536,0.698] | [0.625,0.748] | [0.648,0.824] | [0.658,0.816] | [0.718,0.822] |
| Chinese                   | 0.616         | 0.749             | 0.544         | 0.543         | 0.631         | 0.537         | 0.556         | 0.594         | 0.650         |
|                           | [0.569,0.666] | [0.699,0.803]     | [0.485,0.610] | [0.470,0.627] | [0.563,0.708] | [0.492,0.586] | [0.514,0.601] | [0.555,0.635] | [0.610,0.694] |
| Other Asian background    | 0.522         | 0.613             | 0.450         | 0.579         | 0.579         | 0.513         | 0.488         | 0.541         | 0.579         |
|                           | [0.499,0.546] | [0.587,0.640]     | [0.402,0.505] | [0.508,0.660] | [0.526,0.636] | [0.470,0.560] | [0.448,0.531] | [0.504,0.581] | [0.547,0.613] |
| Black African             | 0.448         | 0.468             | 0.276         | 0.291         | 0.329         | 0.386         | 0.401         | 0.435         | 0.471         |
|                           | [0.435,0.462] | [0.449,0.489]     | [0.241,0.317] | [0.251,0.338] | [0.295,0.366] | [0.349,0.426] | [0.367,0.439] | [0.408,0.465] | [0.450,0.494] |
| Black Caribbean           | 0.356         | 0.515             | 0.493         | 0.575         | 0.555         | 0.488         | 0.412         | 0.382         | 0.371         |
|                           | [0.330,0.384] | [0.480,0.553]     | [0.463,0.524] | [0.515,0.642] | [0.487,0.631] | [0.442,0.540] | [0.370,0.458] | [0.347,0.420] | [0.337,0.408] |
| Other Black background    | 0.398         | 0.456             | 0.409         | 0.378         | 0.411         | 0.462         | 0.477         | 0.419         | 0.419         |
|                           | [0.367,0.432] | [0.415,0.500]     | [0.330,0.506] | [0.286,0.500] | [0.325,0.521] | [0.383,0.558] | [0.396,0.575] | [0.368,0.477] | [0.374,0.470] |
| Arab                      | 0.404         | 0.412             | 0.442         | 0.407         | 0.535         | 0.512         | 0.508         | 0.369         | 0.495         |
|                           | [0.355,0.461] | [0.360,0.471]     | [0.288,0.679] | [0.266,0.622] | [0.391,0.732] | [0.371,0.705] | [0.393,0.657] | [0.290,0.471] | [0.423,0.579] |
| Other ethnic group        | 0.679         | 0.839             | 1.087         | 1.064         | 0.965         | 0.881         | 0.804         | 0.721         | 0.695         |
|                           | [0.655,0.703] | [0.817,0.861]     | [1.050,1.124] | [1.027,1.101] | [0.935,0.997] | [0.849,0.914] | [0.766,0.844] | [0.691,0.752] | [0.668,0.723] |
| Observations              | 107879        | 251801            | 95177         | 79403         | 114478        | 101721        | 84850         | 114400        | 132840        |

Exponentiated coefficients; 95% confidence intervals in brackets

**Table C** – Vaccine uptake standardised to GM vaccine eligibility group structure. Estimated percentage uptake with 95% confidence intervals

|                           | Covid-19 vaccine<br>(all population) | Covid-19 vaccine<br>(Influenza vaccine<br>eligible population) | Influenza vaccine<br>(Influenza vaccine<br>eligible population) |
|---------------------------|--------------------------------------|----------------------------------------------------------------|-----------------------------------------------------------------|
| White British             | 87.83<br>[87.76,87.90]               | 88.94<br>[88.86,89.02]                                         | 56.14<br>[56.01,56.26]                                          |
| White Irish               | 84.11<br>[83.35,84.87]               | 86.51<br>[85.68,87.35]                                         | 53.53<br>[52.40,54.67]                                          |
| Other White background    | 71.41<br>[70.99,71.83]               | 75.12<br>[74.61,75.63]                                         | 49.99<br>[49.41,50.57]                                          |
| White and Black Caribbean | 67.46<br>[65.49,69.43]               | 70.42<br>[67.98,72.86]                                         | 42.51<br>[39.72,45.31]                                          |
| White and Black African   | 65.91<br>[63.37,68.45]               | 67.22<br>[63.81,70.63]                                         | 41.15<br>[37.58,44.72]                                          |
| White and Asian           | 78.47<br>[76.20,80.73]               | 78.08<br>[75.15,81.01]                                         | 47.18<br>[43.60,50.76]                                          |
| Other Mixed or Multiple   | 68.15<br>[66.40,69.90]               | 69.74<br>[67.48,72.00]                                         | 45.85<br>[43.41,48.29]                                          |
| Indian                    | 84.16<br>[83.58,84.73]               | 85.30<br>[84.63,85.96]                                         | 55.26<br>[54.36,56.15]                                          |
| Pakistani                 | 74.27<br>[73.82,74.73]               | 76.23<br>[75.70,76.76]                                         | 54.36<br>[53.76,54.96]                                          |
| Bangladeshi               | 80.88<br>[79.83,81.92]               | 79.96<br>[78.75,81.18]                                         | 59.37<br>[57.94,60.81]                                          |
| Chinese                   | 76.12<br>[75.03,77.22]               | 77.85<br>[76.42,79.29]                                         | 52.79<br>[51.12,54.46]                                          |
| Other Asian background    | 70.49<br>[69.59,71.40]               | 73.42<br>[72.27,74.57]                                         | 44.89<br>[43.61,46.17]                                          |
| Black African             | 61.44<br>[60.46,62.42]               | 61.80<br>[60.50,63.10]                                         | 42.25<br>[40.94,43.56]                                          |
| Black Caribbean           | 62.61<br>[61.46,63.76]               | 66.60<br>[65.20,68.01]                                         | 43.55<br>[42.08,45.02]                                          |
| Other Black background    | 60.95<br>[58.96,62.94]               | 62.43<br>[59.81,65.05]                                         | 42.66<br>[39.96,45.35]                                          |
| Arab                      | 65.24<br>[62.06,68.41]               | 67.51<br>[63.34,71.68]                                         | 48.73<br>[44.40,53.06]                                          |
| Other ethnic group        | 82.48<br>[82.07,82.88]               | 85.91<br>[85.48,86.34]                                         | 59.64<br>[59.06,60.23]                                          |

% vaccine uptake, 95% confidence intervals in brackets  
Sample restricted to those alive at end of follow-up period

**Table D – Associations between ethnic group and Influenza vaccine uptake** (results also in Figure 1B)  
Hazard ratios with 95% confidence intervals from Cox proportional hazards models estimating time-to-Influenza vaccination across ethnic groups, stratified by vaccine eligibility group

|                         | High clinical | Moderate clinical | 80+           | 75-79         | 70-74         | 65-69         |
|-------------------------|---------------|-------------------|---------------|---------------|---------------|---------------|
| White British           | Ref           | Ref               | Ref           | Ref           | Ref           | Ref           |
|                         | -             | -                 | -             | -             | -             | -             |
| White Irish             | 0.932         | 0.980             | 0.862         | 0.920         | 0.880         | 0.888         |
|                         | [0.845,1.029] | [0.909,1.057]     | [0.820,0.906] | [0.870,0.972] | [0.830,0.932] | [0.820,0.962] |
| Other White background  | 0.757         | 0.739             | 0.939         | 0.916         | 0.916         | 0.823         |
|                         | [0.721,0.794] | [0.714,0.765]     | [0.902,0.978] | [0.872,0.961] | [0.879,0.955] | [0.783,0.864] |
| White & Black Caribbean | 0.597         | 0.607             | 0.620         | 0.729         | 0.781         | 0.621         |
|                         | [0.518,0.688] | [0.536,0.688]     | [0.505,0.762] | [0.539,0.984] | [0.599,1.018] | [0.462,0.834] |
| White and Black African | 0.648         | 0.756             | 0.573         | 0.455         | 0.660         | 0.558         |
|                         | [0.579,0.726] | [0.671,0.852]     | [0.380,0.864] | [0.278,0.746] | [0.499,0.875] | [0.408,0.763] |
| White and Asian         | 0.752         | 0.874             | 0.627         | 0.659         | 0.874         | 0.721         |
|                         | [0.642,0.882] | [0.768,0.995]     | [0.405,0.970] | [0.484,0.898] | [0.652,1.171] | [0.547,0.950] |
| Other Mixed or Multiple | 0.739         | 0.621             | 0.692         | 0.785         | 0.836         | 0.860         |
|                         | [0.660,0.826] | [0.557,0.693]     | [0.539,0.889] | [0.597,1.032] | [0.694,1.006] | [0.691,1.072] |
| Indian                  | 0.812         | 1.050             | 0.839         | 0.947         | 0.995         | 1.111         |
|                         | [0.773,0.852] | [1.003,1.100]     | [0.783,0.898] | [0.875,1.025] | [0.933,1.062] | [1.043,1.183] |
| Pakistani               | 0.884         | 1.080             | 0.775         | 0.794         | 0.902         | 0.991         |
|                         | [0.861,0.907] | [1.055,1.106]     | [0.737,0.815] | [0.746,0.844] | [0.859,0.948] | [0.949,1.035] |
| Bangladeshi             | 1.070         | 1.212             | 0.869         | 0.968         | 0.934         | 1.301         |
|                         | [1.023,1.119] | [1.151,1.277]     | [0.786,0.960] | [0.845,1.108] | [0.821,1.062] | [1.172,1.444] |
| Chinese                 | 0.820         | 1.035             | 0.885         | 0.798         | 0.852         | 0.926         |
|                         | [0.728,0.924] | [0.943,1.137]     | [0.790,0.992] | [0.687,0.927] | [0.759,0.955] | [0.833,1.029] |
| Other Asian background  | 0.746         | 0.816             | 0.545         | 0.662         | 0.729         | 0.728         |
|                         | [0.699,0.795] | [0.771,0.864]     | [0.481,0.618] | [0.574,0.763] | [0.655,0.810] | [0.656,0.807] |
| Black African           | 0.769         | 0.738             | 0.547         | 0.534         | 0.619         | 0.632         |
|                         | [0.740,0.798] | [0.700,0.778]     | [0.477,0.628] | [0.463,0.617] | [0.553,0.692] | [0.560,0.714] |
| Black Caribbean         | 0.692         | 0.682             | 0.753         | 0.756         | 0.614         | 0.583         |
|                         | [0.633,0.757] | [0.622,0.749]     | [0.702,0.808] | [0.672,0.851] | [0.532,0.709] | [0.507,0.671] |
| Other Black background  | 0.695         | 0.748             | 0.595         | 0.636         | 0.599         | 0.649         |
|                         | [0.628,0.770] | [0.667,0.838]     | [0.469,0.756] | [0.484,0.836] | [0.462,0.778] | [0.510,0.824] |
| Arab                    | 0.823         | 0.878             | 0.944         | 0.564         | 0.612         | 0.943         |
|                         | [0.697,0.972] | [0.754,1.022]     | [0.629,1.417] | [0.315,1.009] | [0.430,0.872] | [0.676,1.314] |
| Other ethnic group      | 0.980         | 1.073             | 1.134         | 1.167         | 1.133         | 1.135         |
|                         | [0.939,1.023] | [1.037,1.110]     | [1.095,1.174] | [1.120,1.216] | [1.092,1.176] | [1.083,1.191] |
| Observations            | 109199        | 253000            | 102371        | 81786         | 116595        | 89043         |

Exponentiated coefficients; 95% confidence intervals in brackets

**Table E – Associations between ethnic group and vaccine uptake** (results also in Figure 1C) Hazard ratios with 95% confidence intervals from Cox proportional hazards models estimating time-to-vaccination across ethnic groups, adjusted by vaccine eligibility group

|                           | Covid-19 vaccine<br>2020/21 | Influenza vaccine<br>2019/20 | Covid-19 vaccine<br>2020/21 – excluding<br>individuals who died<br>during follow-up |
|---------------------------|-----------------------------|------------------------------|-------------------------------------------------------------------------------------|
| White British             | Ref                         | Ref                          | Ref                                                                                 |
| White Irish               | 0.978<br>[0.948,1.008]      | 0.898<br>[0.874,0.923]       | 0.979<br>[0.950,1.010]                                                              |
| Other White background    | 0.636<br>[0.625,0.647]      | 0.833<br>[0.818,0.847]       | 0.634<br>[0.622,0.645]                                                              |
| White and Black Caribbean | 0.496<br>[0.466,0.528]      | 0.626<br>[0.581,0.675]       | 0.495<br>[0.465,0.527]                                                              |
| White and Black African   | 0.495<br>[0.467,0.526]      | 0.674<br>[0.626,0.724]       | 0.495<br>[0.466,0.525]                                                              |
| White and Asian           | 0.627<br>[0.585,0.672]      | 0.788<br>[0.725,0.857]       | 0.627<br>[0.585,0.672]                                                              |
| Other Mixed or Multiple   | 0.507<br>[0.480,0.535]      | 0.709<br>[0.665,0.755]       | 0.507<br>[0.480,0.536]                                                              |
| Indian                    | 0.788<br>[0.770,0.806]      | 0.943<br>[0.921,0.966]       | 0.788<br>[0.770,0.806]                                                              |
| Pakistani                 | 0.537<br>[0.530,0.544]      | 0.939<br>[0.926,0.953]       | 0.536<br>[0.529,0.543]                                                              |
| Bangladeshi               | 0.577<br>[0.564,0.591]      | 1.082<br>[1.051,1.113]       | 0.576<br>[0.562,0.589]                                                              |
| Chinese                   | 0.575<br>[0.549,0.603]      | 0.897<br>[0.856,0.941]       | 0.573<br>[0.547,0.601]                                                              |
| Other Asian background    | 0.540<br>[0.524,0.556]      | 0.736<br>[0.711,0.762]       | 0.539<br>[0.523,0.555]                                                              |
| Black African             | 0.430<br>[0.420,0.440]      | 0.722<br>[0.703,0.742]       | 0.430<br>[0.420,0.440]                                                              |
| Black Caribbean           | 0.435<br>[0.418,0.454]      | 0.695<br>[0.667,0.724]       | 0.434<br>[0.416,0.452]                                                              |
| Other Black background    | 0.419<br>[0.395,0.443]      | 0.690<br>[0.647,0.736]       | 0.418<br>[0.394,0.442]                                                              |
| Arab                      | 0.434<br>[0.399,0.473]      | 0.824<br>[0.748,0.907]       | 0.434<br>[0.399,0.473]                                                              |
| Other ethnic group        | 0.914<br>[0.900,0.928]      | 1.106<br>[1.089,1.124]       | 0.912<br>[0.898,0.927]                                                              |
| High clinical             | 1.000<br>[1.000,1.000]      | 1.000<br>[1.000,1.000]       | 1.000<br>[1.000,1.000]                                                              |
| Moderate clinical         | 0.529<br>[0.526,0.533]      | 0.630<br>[0.624,0.636]       | 0.528<br>[0.525,0.532]                                                              |
| 80+                       | 2.535<br>[2.501,2.569]      | 1.874<br>[1.854,1.894]       | 2.563<br>[2.528,2.598]                                                              |
| 75-79                     | 2.116<br>[2.091,2.142]      | 1.820<br>[1.799,1.841]       | 2.128<br>[2.103,2.155]                                                              |
| 70-74                     | 1.525<br>[1.511,1.539]      | 1.596<br>[1.579,1.613]       | 1.529<br>[1.515,1.543]                                                              |
| 65-69                     | 0.939<br>[0.932,0.947]      | 1.214<br>[1.200,1.228]       | 0.939<br>[0.932,0.947]                                                              |
| Observations              | 737392                      | 752494                       | 728540                                                                              |

Exponentiated coefficients; 95% confidence intervals in brackets



**Figure D – Associations between ethnic group and vaccine uptake by gender** (results also in Table S6)  
 Hazard ratios with 95% confidence intervals from Cox proportional hazards models estimating time-to-vaccination across ethnic groups, adjusted by vaccine eligibility group, stratified by gender. (A) Male, (B) Female.

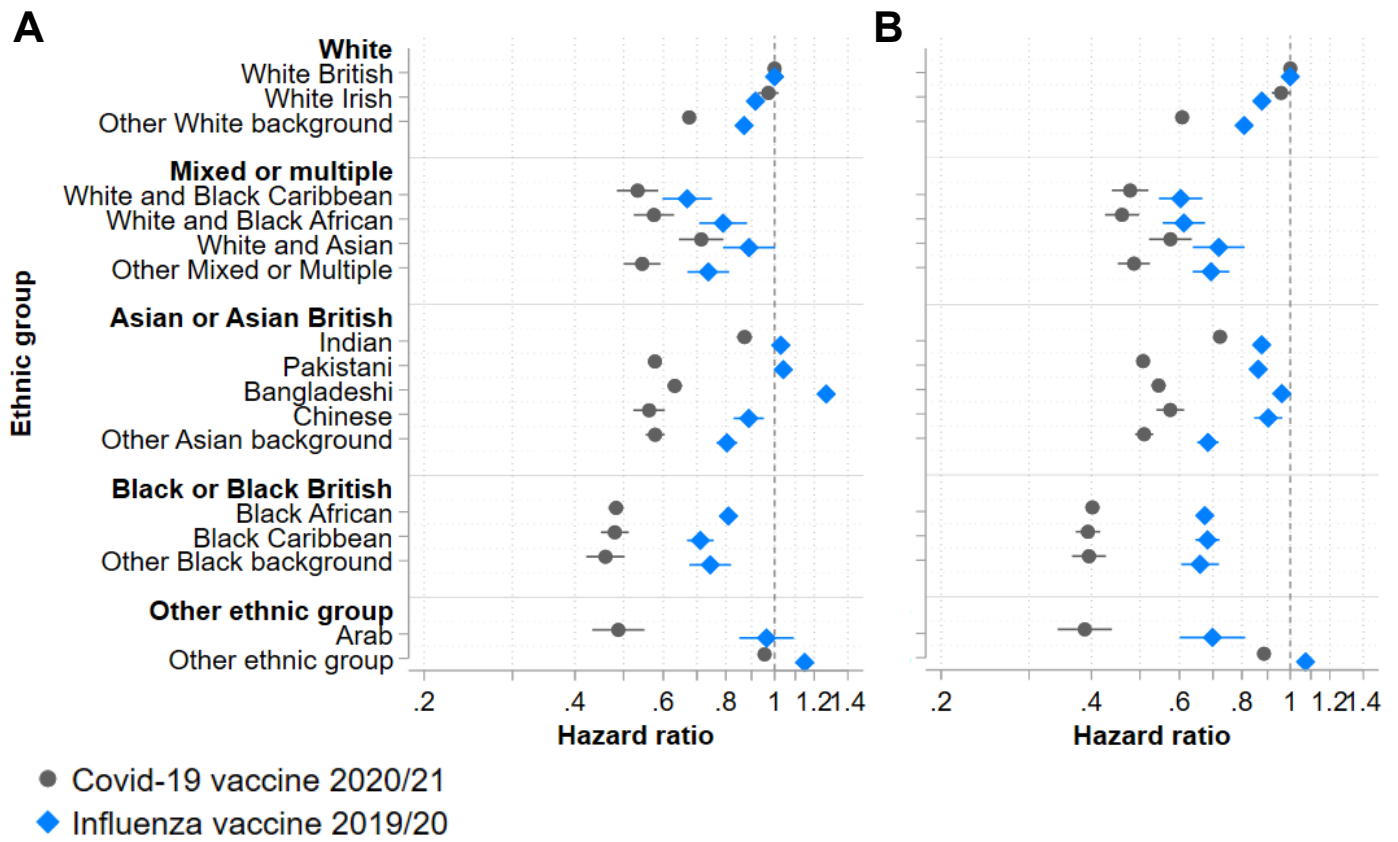

**Table F – Associations between ethnic group and vaccine uptake by gender** (results also in Figure S4)  
Hazard ratios with 95% confidence intervals from Cox proportional hazards models estimating time-to-vaccination across ethnic groups, adjusted by vaccine eligibility group, stratified by gender

|                           | Male                   |                        | Female                 |                        |
|---------------------------|------------------------|------------------------|------------------------|------------------------|
|                           | Covid-19 vaccine       | Influenza vaccine      | Covid-19 vaccine       | Influenza vaccine      |
| White British             | Ref<br>-               | Ref<br>-               | Ref<br>-               | Ref<br>-               |
| White Irish               | 0.972<br>[0.927,1.019] | 0.916<br>[0.880,0.953] | 0.958<br>[0.918,1.000] | 0.877<br>[0.844,0.911] |
| Other White background    | 0.676<br>[0.658,0.694] | 0.869<br>[0.847,0.892] | 0.607<br>[0.593,0.622] | 0.808<br>[0.789,0.828] |
| White and Black Caribbean | 0.533<br>[0.485,0.586] | 0.670<br>[0.598,0.750] | 0.478<br>[0.439,0.520] | 0.603<br>[0.546,0.667] |
| White and Black African   | 0.575<br>[0.524,0.631] | 0.790<br>[0.707,0.882] | 0.460<br>[0.425,0.498] | 0.612<br>[0.555,0.675] |
| White and Asian           | 0.714<br>[0.645,0.791] | 0.889<br>[0.790,1.001] | 0.575<br>[0.522,0.635] | 0.719<br>[0.638,0.810] |
| Other Mixed or Multiple   | 0.544<br>[0.500,0.592] | 0.738<br>[0.670,0.812] | 0.486<br>[0.452,0.524] | 0.694<br>[0.638,0.756] |
| Indian                    | 0.871<br>[0.840,0.903] | 1.029<br>[0.994,1.065] | 0.723<br>[0.701,0.746] | 0.876<br>[0.847,0.906] |
| Pakistani                 | 0.577<br>[0.566,0.589] | 1.041<br>[1.021,1.063] | 0.507<br>[0.498,0.516] | 0.863<br>[0.845,0.880] |
| Bangladeshi               | 0.632<br>[0.610,0.655] | 1.267<br>[1.217,1.320] | 0.545<br>[0.527,0.563] | 0.962<br>[0.924,1.001] |
| Chinese                   | 0.562<br>[0.523,0.604] | 0.888<br>[0.829,0.952] | 0.575<br>[0.539,0.613] | 0.903<br>[0.847,0.964] |
| Other Asian background    | 0.578<br>[0.553,0.604] | 0.803<br>[0.766,0.843] | 0.510<br>[0.489,0.532] | 0.684<br>[0.651,0.719] |
| Black African             | 0.483<br>[0.466,0.501] | 0.809<br>[0.778,0.842] | 0.402<br>[0.389,0.415] | 0.674<br>[0.650,0.699] |
| Black Caribbean           | 0.480<br>[0.450,0.512] | 0.711<br>[0.669,0.756] | 0.393<br>[0.372,0.416] | 0.683<br>[0.646,0.722] |
| Other Black background    | 0.460<br>[0.421,0.503] | 0.744<br>[0.676,0.819] | 0.395<br>[0.366,0.427] | 0.660<br>[0.605,0.720] |
| Arab                      | 0.488<br>[0.433,0.550] | 0.964<br>[0.850,1.092] | 0.388<br>[0.342,0.439] | 0.699<br>[0.601,0.812] |
| Other ethnic group        | 0.955<br>[0.933,0.978] | 1.149<br>[1.122,1.176] | 0.886<br>[0.866,0.906] | 1.073<br>[1.050,1.098] |
| High clinical             | Ref<br>-               | Ref<br>-               | Ref<br>-               | Ref<br>-               |
| Mod. clinical             | 0.527<br>[0.521,0.533] | 0.635<br>[0.626,0.644] | 0.517<br>[0.512,0.522] | 0.626<br>[0.617,0.634] |
| 80+                       | 2.891<br>[2.823,2.960] | 1.987<br>[1.954,2.020] | 2.689<br>[2.640,2.738] | 1.865<br>[1.838,1.893] |
| 75-79                     | 2.241<br>[2.196,2.286] | 1.830<br>[1.798,1.862] | 2.201<br>[2.164,2.239] | 1.875<br>[1.845,1.905] |
| 70-74                     | 1.585<br>[1.562,1.609] | 1.584<br>[1.559,1.609] | 1.585<br>[1.565,1.606] | 1.672<br>[1.647,1.697] |
| 65-69                     | 0.928<br>[0.916,0.940] | 1.172<br>[1.152,1.193] | 0.984<br>[0.973,0.995] | 1.312<br>[1.291,1.334] |
| Observations              | 336543                 | 344801                 | 400340                 | 407176                 |

Exponentiated coefficients; 95% confidence intervals in brackets

**Figure E – Associations between ethnic group and Covid-19 vaccine uptake – sensitivity analysis adjusting by locality or income deprivation** (results also in Table S6) Hazard ratios with 95% confidence intervals from Cox proportional hazards models estimating time-to-Covid-19 vaccination across ethnic groups, adjusted by vaccine eligibility group, plus additional adjustment by GM locality (10 local authority areas) or income domain quintile

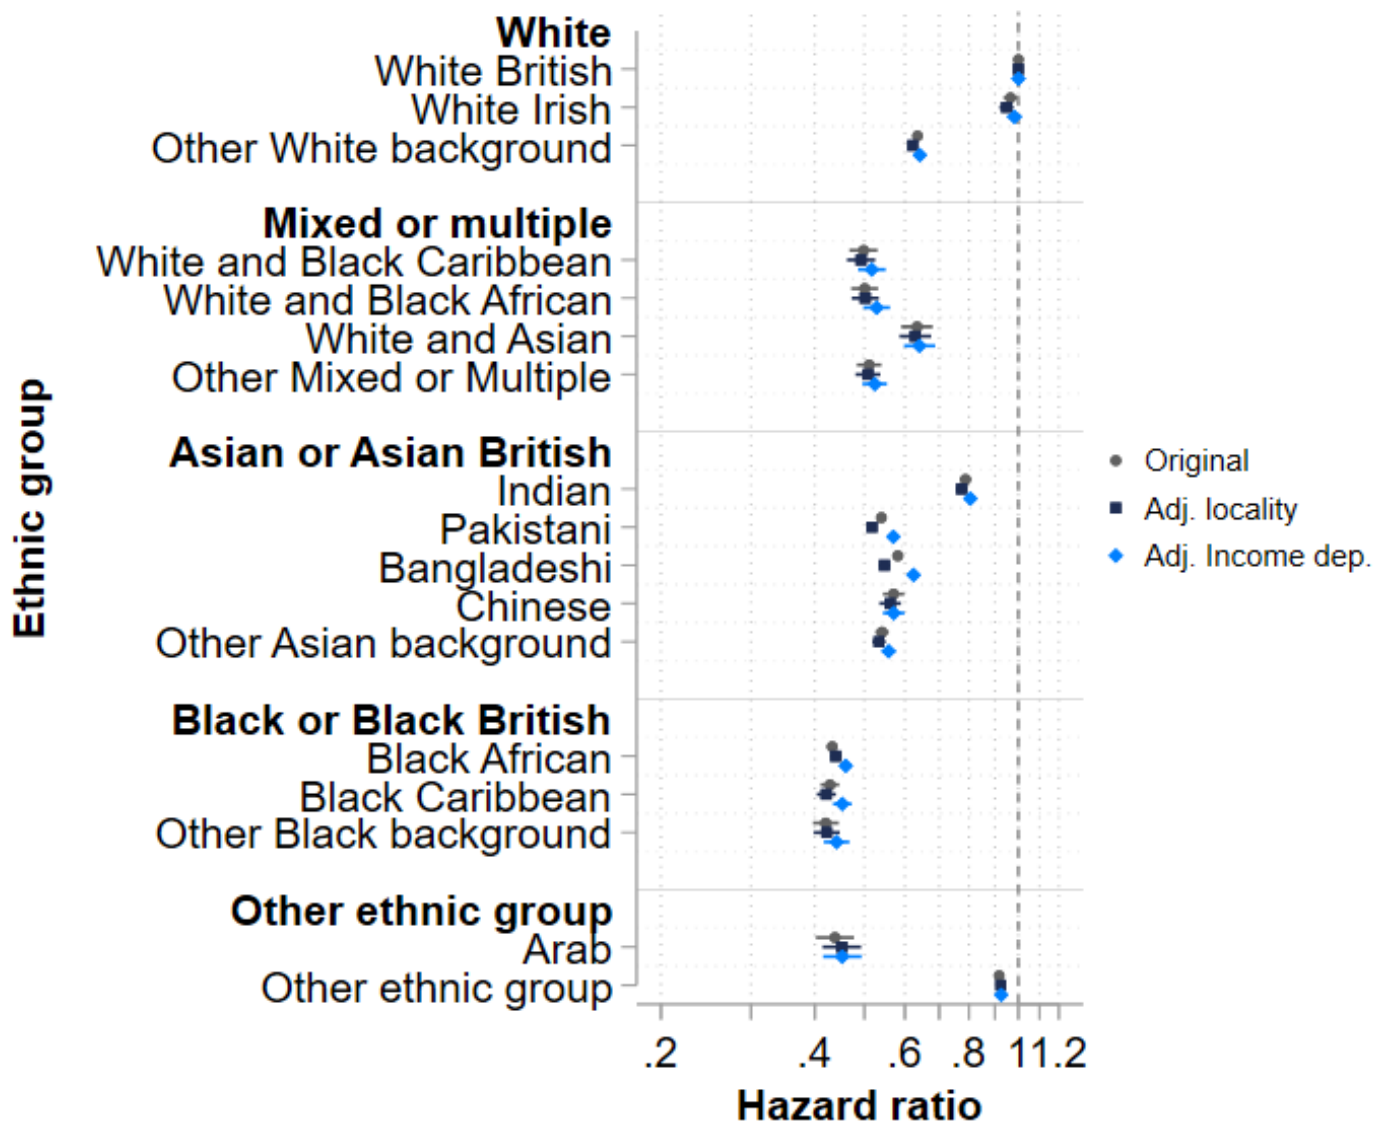

**Table G – Associations between ethnic group and Covid-19 vaccine uptake – sensitivity analysis adjusting by locality or income deprivation** (results also in Figure S4) Hazard ratios with 95% confidence intervals from Cox proportional hazards models estimating time-to-Covid-19 vaccination across ethnic groups, adjusted by vaccine eligibility group, plus additional adjustment by GM locality or income domain quintile

|                           | Covid-19 vaccine<br>(main analysis) | Covid-19 vaccine<br>(adjusted by<br>locality) | Covid-19 vaccine<br>(adjusted by income<br>deprivation quintile) |
|---------------------------|-------------------------------------|-----------------------------------------------|------------------------------------------------------------------|
| White British             | Ref<br>-                            | Ref<br>-                                      | Ref<br>-                                                         |
| White Irish               | 0.965<br>[0.935,0.996]              | 0.948<br>[0.918,0.979]                        | 0.982<br>[0.952,1.014]                                           |
| Other White background    | 0.635<br>[0.623,0.646]              | 0.622<br>[0.611,0.633]                        | 0.642<br>[0.630,0.653]                                           |
| White and Black Caribbean | 0.498<br>[0.468,0.531]              | 0.493<br>[0.462,0.525]                        | 0.517<br>[0.486,0.551]                                           |
| White and Black African   | 0.501<br>[0.471,0.532]              | 0.502<br>[0.472,0.533]                        | 0.529<br>[0.498,0.561]                                           |
| White and Asian           | 0.634<br>[0.590,0.680]              | 0.629<br>[0.585,0.675]                        | 0.641<br>[0.597,0.688]                                           |
| Other Mixed or Multiple   | 0.511<br>[0.483,0.540]              | 0.508<br>[0.481,0.537]                        | 0.524<br>[0.496,0.553]                                           |
| Indian                    | 0.788<br>[0.769,0.807]              | 0.774<br>[0.756,0.794]                        | 0.806<br>[0.786,0.825]                                           |
| Pakistani                 | 0.540<br>[0.532,0.547]              | 0.517<br>[0.510,0.524]                        | 0.570<br>[0.562,0.577]                                           |
| Bangladeshi               | 0.581<br>[0.567,0.595]              | 0.547<br>[0.534,0.561]                        | 0.624<br>[0.609,0.639]                                           |
| Chinese                   | 0.570<br>[0.543,0.598]              | 0.562<br>[0.535,0.590]                        | 0.570<br>[0.544,0.599]                                           |
| Other Asian background    | 0.541<br>[0.525,0.558]              | 0.534<br>[0.518,0.551]                        | 0.558<br>[0.541,0.575]                                           |
| Black African             | 0.432<br>[0.422,0.443]              | 0.439<br>[0.429,0.450]                        | 0.460<br>[0.449,0.471]                                           |
| Black Caribbean           | 0.428<br>[0.410,0.447]              | 0.421<br>[0.404,0.440]                        | 0.453<br>[0.434,0.472]                                           |
| Other Black background    | 0.420<br>[0.396,0.445]              | 0.422<br>[0.398,0.448]                        | 0.441<br>[0.416,0.468]                                           |
| Arab                      | 0.438<br>[0.402,0.477]              | 0.452<br>[0.414,0.493]                        | 0.453<br>[0.415,0.494]                                           |
| Other ethnic group        | 0.917<br>[0.902,0.932]              | 0.924<br>[0.909,0.940]                        | 0.926<br>[0.911,0.941]                                           |
| High clinical             | 1.000<br>[1.000,1.000]              | 1.000<br>[1.000,1.000]                        | 1.000<br>[1.000,1.000]                                           |
| Mod. clinical             | 0.522<br>[0.519,0.526]              | 0.518<br>[0.514,0.522]                        | 0.510<br>[0.506,0.514]                                           |
| 80+                       | 2.776<br>[2.736,2.816]              | 2.814<br>[2.773,2.855]                        | 2.669<br>[2.631,2.708]                                           |
| 75-79                     | 2.225<br>[2.196,2.254]              | 2.271<br>[2.241,2.301]                        | 2.131<br>[2.103,2.159]                                           |
| 70-74                     | 1.588<br>[1.573,1.604]              | 1.601<br>[1.586,1.617]                        | 1.525<br>[1.510,1.540]                                           |
| 65-69                     | 0.959<br>[0.951,0.968]              | 0.957<br>[0.949,0.965]                        | 0.922<br>[0.914,0.930]                                           |
| Stockport                 |                                     | Ref<br>-                                      |                                                                  |
| Trafford                  |                                     | 1.213<br>[1.195,1.231]                        |                                                                  |
| Bury                      |                                     | 1.323<br>[1.302,1.344]                        |                                                                  |

|                |        |               |        |
|----------------|--------|---------------|--------|
| Wigan          |        | 0.778         |        |
|                |        | [0.768,0.788] |        |
| Tameside       |        | 1.119         |        |
|                |        | [1.103,1.135] |        |
| Rochdale       |        | 1.144         |        |
|                |        | [1.129,1.161] |        |
| Salford        |        | 0.984         |        |
|                |        | [0.969,0.998] |        |
| Bolton         |        | 0.999         |        |
|                |        | [0.986,1.013] |        |
| Oldham         |        | 1.101         |        |
|                |        | [1.086,1.116] |        |
| Manchester     |        | 0.953         |        |
|                |        | [0.941,0.965] |        |
| <hr/>          |        |               | Ref    |
| Least deprived |        | -             |        |
| Q2             |        | 0.998         |        |
|                |        | [0.986,1.010] |        |
| Q3             |        | 0.929         |        |
|                |        | [0.919,0.940] |        |
| Q4             |        | 0.919         |        |
|                |        | [0.909,0.929] |        |
| Most deprived  |        | 0.807         |        |
|                |        | [0.799,0.815] |        |
| <hr/>          |        |               |        |
| Observations   | 736898 | 736898        | 736898 |
| <hr/>          |        |               |        |

Exponentiated coefficients; 95% confidence intervals in brackets

**Table H – Associations between ethnic group and vaccine uptake by income deprivation** (results also in Figure 2) Hazard ratios with 95% confidence intervals from Cox proportional hazards models estimating time-to-vaccination across ethnic groups, adjusted by vaccine eligibility group, stratified by income deprivation

|                           | IMD income quintile 1 (least deprived) |                        | IMD income quintile 5 (most deprived) |                        |
|---------------------------|----------------------------------------|------------------------|---------------------------------------|------------------------|
|                           | Covid-19 vaccine                       | Influenza vaccine      | Covid-19 vaccine                      | Influenza vaccine      |
| White British             | Ref                                    | Ref                    | Ref                                   | Ref                    |
| White Irish               | 0.952<br>[0.869,1.043]                 | 0.861<br>[0.794,0.935] | 1.024<br>[0.975,1.076]                | 0.942<br>[0.901,0.984] |
| Other White background    | 0.669<br>[0.636,0.704]                 | 0.927<br>[0.887,0.968] | 0.569<br>[0.554,0.585]                | 0.734<br>[0.712,0.757] |
| White and Black Caribbean | 0.647<br>[0.520,0.805]                 | 0.662<br>[0.484,0.906] | 0.469<br>[0.431,0.511]                | 0.656<br>[0.594,0.725] |
| White and Black African   | 0.754<br>[0.550,1.033]                 | 0.880<br>[0.642,1.207] | 0.475<br>[0.441,0.511]                | 0.670<br>[0.613,0.732] |
| White and Asian           | 0.763<br>[0.642,0.908]                 | 0.944<br>[0.756,1.180] | 0.573<br>[0.512,0.641]                | 0.779<br>[0.683,0.890] |
| Other Mixed or Multiple   | 0.696<br>[0.594,0.817]                 | 0.765<br>[0.629,0.931] | 0.460<br>[0.425,0.498]                | 0.721<br>[0.658,0.789] |
| Indian                    | 0.802<br>[0.743,0.866]                 | 0.830<br>[0.771,0.894] | 0.811<br>[0.786,0.837]                | 1.010<br>[0.976,1.045] |
| Pakistani                 | 0.674<br>[0.627,0.724]                 | 0.783<br>[0.723,0.848] | 0.547<br>[0.538,0.556]                | 1.001<br>[0.984,1.020] |
| Bangladeshi               | 0.596<br>[0.489,0.725]                 | 0.974<br>[0.801,1.185] | 0.610<br>[0.594,0.626]                | 1.148<br>[1.112,1.185] |
| Chinese                   | 0.484<br>[0.430,0.545]                 | 0.781<br>[0.693,0.881] | 0.620<br>[0.575,0.668]                | 1.001<br>[0.928,1.081] |
| Other Asian background    | 0.592<br>[0.530,0.661]                 | 0.744<br>[0.665,0.832] | 0.522<br>[0.502,0.544]                | 0.746<br>[0.711,0.783] |
| Black African             | 0.430<br>[0.358,0.517]                 | 0.661<br>[0.545,0.803] | 0.456<br>[0.443,0.468]                | 0.750<br>[0.727,0.774] |
| Black Caribbean           | 0.635<br>[0.516,0.782]                 | 0.914<br>[0.751,1.113] | 0.438<br>[0.415,0.461]                | 0.725<br>[0.688,0.764] |
| Other Black background    | 0.435<br>[0.316,0.600]                 | 0.792<br>[0.593,1.056] | 0.407<br>[0.378,0.438]                | 0.706<br>[0.651,0.766] |
| Arab                      | 0.323<br>[0.208,0.500]                 | 0.660<br>[0.440,0.990] | 0.461<br>[0.413,0.513]                | 0.855<br>[0.753,0.971] |
| Other ethnic group        | 1.085<br>[1.041,1.131]                 | 1.194<br>[1.146,1.243] | 0.769<br>[0.749,0.790]                | 1.009<br>[0.980,1.038] |
| High clinical             | Ref                                    | Ref                    | Ref                                   | Ref                    |
| Mod. clinical             | 0.461<br>[0.451,0.472]                 | 0.649<br>[0.628,0.671] | 0.527<br>[0.521,0.533]                | 0.608<br>[0.600,0.617] |
| 80+                       | 2.373<br>[2.291,2.458]                 | 1.972<br>[1.908,2.038] | 2.267<br>[2.215,2.320]                | 1.781<br>[1.750,1.813] |
| 75-79                     | 1.774<br>[1.721,1.830]                 | 1.916<br>[1.852,1.982] | 2.052<br>[2.007,2.099]                | 1.681<br>[1.648,1.715] |
| 70-74                     | 1.263<br>[1.232,1.295]                 | 1.728<br>[1.673,1.785] | 1.546<br>[1.521,1.571]                | 1.459<br>[1.434,1.485] |
| 65-69                     | 0.779<br>[0.761,0.797]                 | 1.349<br>[1.303,1.396] | 0.962<br>[0.949,0.976]                | 1.107<br>[1.086,1.128] |
| Observations              | 100272                                 | 101966                 | 278963                                | 285088                 |

Exponentiated coefficients; 95% confidence intervals in brackets

**Table 1 – Associations between ethnic group and vaccine uptake by prior Influenza vaccine uptake** (results also in Figure 3) Hazard ratios with 95% confidence intervals from Cox proportional hazards models estimating time-to-Covid-19 vaccination across ethnic groups, adjusted by vaccine eligibility group, stratified by prior Influenza vaccine uptake

|                           | Had Influenza vaccine 2019/20 | Did not have Influenza vaccine 2019/20 |
|---------------------------|-------------------------------|----------------------------------------|
| White British             | Ref<br>-                      | Ref<br>-                               |
| White Irish               | 1.002<br>[0.957,1.048]        | 1.013<br>[0.970,1.059]                 |
| Other White background    | 0.589<br>[0.574,0.603]        | 0.657<br>[0.638,0.678]                 |
| White and Black Caribbean | 0.483<br>[0.445,0.523]        | 0.571<br>[0.510,0.640]                 |
| White and Black African   | 0.496<br>[0.458,0.538]        | 0.528<br>[0.480,0.581]                 |
| White and Asian           | 0.608<br>[0.552,0.670]        | 0.688<br>[0.619,0.765]                 |
| Other Mixed or Multiple   | 0.498<br>[0.463,0.535]        | 0.553<br>[0.506,0.605]                 |
| Indian                    | 0.792<br>[0.767,0.818]        | 0.776<br>[0.748,0.805]                 |
| Pakistani                 | 0.535<br>[0.525,0.545]        | 0.494<br>[0.484,0.504]                 |
| Bangladeshi               | 0.562<br>[0.541,0.584]        | 0.512<br>[0.495,0.531]                 |
| Chinese                   | 0.523<br>[0.489,0.560]        | 0.611<br>[0.569,0.656]                 |
| Other Asian background    | 0.519<br>[0.499,0.540]        | 0.636<br>[0.607,0.665]                 |
| Black African             | 0.427<br>[0.414,0.442]        | 0.435<br>[0.419,0.452]                 |
| Black Caribbean           | 0.444<br>[0.420,0.470]        | 0.411<br>[0.383,0.441]                 |
| Other Black background    | 0.389<br>[0.359,0.421]        | 0.486<br>[0.444,0.532]                 |
| Arab                      | 0.397<br>[0.349,0.451]        | 0.450<br>[0.395,0.512]                 |
| Other ethnic group        | 0.796<br>[0.775,0.817]        | 0.914<br>[0.893,0.934]                 |
| High clinical             | Ref<br>-                      | Ref<br>-                               |
| Moderate clinical         | 0.531<br>[0.526,0.537]        | 0.556<br>[0.550,0.561]                 |
| 80+                       | 1.086<br>[1.062,1.110]        | 4.449<br>[4.364,4.536]                 |
| 75-79                     | 1.184<br>[1.158,1.210]        | 3.124<br>[3.075,3.175]                 |
| 70-74                     | 1.067<br>[1.050,1.085]        | 1.961<br>[1.938,1.984]                 |
| 65-69                     | 0.847<br>[0.835,0.859]        | 0.999<br>[0.989,1.010]                 |
| Observations              | 327440                        | 409458                                 |

Exponentiated coefficients; 95% confidence intervals in brackets
